# Supplementary material for: Rapid, randomized development of genetically encoded FRET sensors for small molecules
Source: Royal Society of Chemistry journal article supplement (doi:10.1039/c5an00707k), 2015-01-01

## Supplementary Information

### Supplementary Table 1

Characteristics of mglB-derived glucose sensors

| Clone     | Mutation                      | Dissociation constant, $K_d$ ( $\mu\text{M}$ ) |
|-----------|-------------------------------|------------------------------------------------|
| gT112     | truncation                    | 0.5                                            |
| gT112M37  | truncation, L238M             | 284                                            |
| gT112M44  | truncation, Q45L, K223R       | 1.1                                            |
| gT112M179 | truncation, K113N             | 159                                            |
| gT112M183 | truncation, D154H             | 53                                             |
| gT112M192 | truncation, D50E, K58I, S229C | 0.3                                            |

## Supplementary Table 2

Characteristics of PdhR-derived pyruvate sensors

|           | <b>Mutation</b>                 | <b>Dissociation constant, <math>K_d</math> (<math>\mu\text{M}</math>)</b> |
|-----------|---------------------------------|---------------------------------------------------------------------------|
| pT162     | Truncation                      | 410                                                                       |
| pT162M57  | Truncation, D92A                | n.a.                                                                      |
| pT162M60  | Truncation , A217V              | n.a.                                                                      |
| pT162M61  | Truncation, D92A                | 710                                                                       |
| pT162M100 | Truncation, A112T               | 2500                                                                      |
| pT162M104 | Truncation, S77N                | 390                                                                       |
| pT162M115 | Truncation, V188D, V198M, S245T | n.a.                                                                      |
| pT162M156 | Truncation, S83G, N163K         | 70                                                                        |
| pT162M176 | Truncation, C172Y, D92G         | 330                                                                       |

### Supplementary Table 3

Characteristics of TbpA-derived thiamine sensors

| Clone | Mutation                  | Dissociation constant, $K_d$ ( $\mu\text{M}$ ) |
|-------|---------------------------|------------------------------------------------|
| TbpA  | -                         | 1.30                                           |
| tM51  | K19N, S218P               | 1.90                                           |
| tM110 | P158S, G35R               | 0.17                                           |
| tM152 | S91N, D121N, Q134H, K228N | 0.06                                           |
| tM172 | Q196S, N279D              | 1.20                                           |

## Supplementary Table 4

List of primers used in this work

|                                                                       | Forward Primer (5' - 3')               | Reverse Primer (5' - 3')             |
|-----------------------------------------------------------------------|----------------------------------------|--------------------------------------|
| Addition of SacI site to pGWF1*                                       | GTCGACGGTACCCCGGGATGCAAAATCGGCTGACC    | GCACCCCGCCGACTAGTGGACAGGGTGGCGG-3    |
| Removal of 3 residues from the N-terminus of Venus in pGWF1           | ATCAACACTAGTGAGCTGTTACCCGGGGTGGT       | GTGACAGGGCCCTTACTTGTACAGCTCGTCCA     |
| Cloning of mglB into pFRET and generation of truncation library       | TTACTACCGGGTGTGATACTCGCATTGGTGT        | GCGGGCACTAGTTTTCTTGCTGAATTCAGCCA     |
| Cloning of TbpA into pFRET and generation of truncation library       | TCGGTCCC GCGGTA AACCCGTTCTGACTGTTTATAC | ATAGATACTAGTACGGCTGACGGCGCGTTGCCATTC |
| Cloning of PdhR into pFRET and generation of truncation library       | ATAATACCGGGTatgGCCTACAGCAAAATCCGCC     | ACGCGCACTAGTATTCTTTCGTTGCTCCAGACGAC  |
| Cloning of pyruvate sensor constructs into pcDNA <sup>TM</sup> 3.1(+) | ATACTAGGTACCATGGCTAGCATGACTGGTG        | GGACGAGCTGTACAAGTAAGAATTCGATCTG      |
| Generation of mutation libraries                                      | TCGAGGTGAGCAAGGGCGAGGAG                | GGATCACTCTCGGCATGGACGAGC             |

\* using pGWF1 containing the gene TreR (described in Peroza et. al., Anal Biochem., 2015)

## Supplementary Figure 1

Detailed information about the generation of truncated versions of the mglB

(a) Sequence of the PCR product indicating the restriction sites *Sac*II and *Spe*I and additional nucleotides introduced by the primers used for amplification (shaded in orange). (b) Sequences of the truncated versions of mglB found in clones 2B4 and 1C2 after treatment with exonuclease III and mung bean nuclease. (c) Product of the ligation of the digested amplicons into the pGEM<sup>®</sup>-T vector FRET. The nucleotides adenine and the thiamine that were added by TA-cloning are indicated in red. The restriction sites *Sac*II and *Spe*I from pGEM<sup>®</sup>-T are underlined (d) Product of the subcloning of the truncated versions of mglB into pFRET using the *Sac*II and *Spe*I sites.

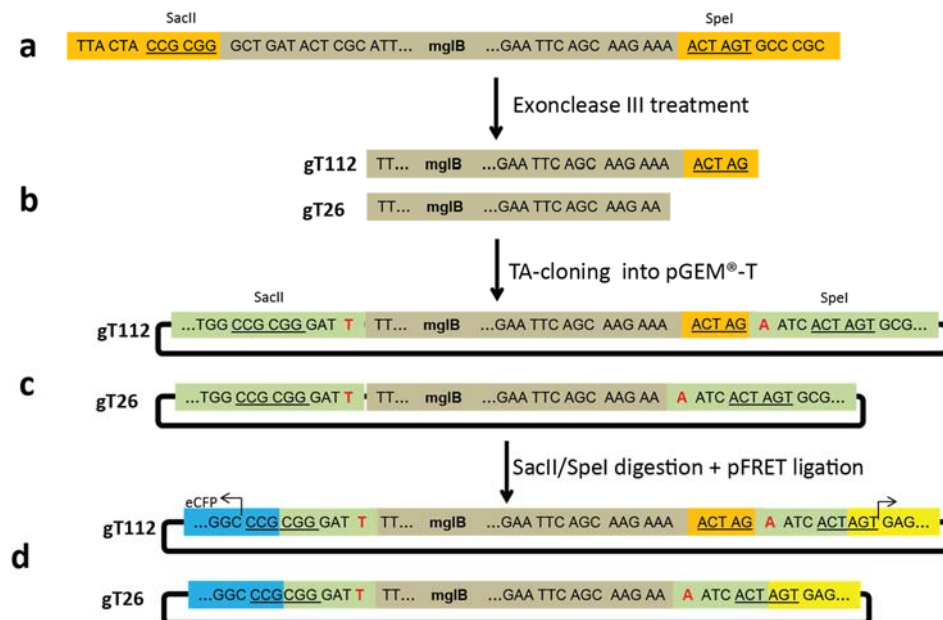

## Supplementary Figure 2

Mutations occurring the MglB derivatives. Structure images were generated using data reported by Borrok et al. (Protein Sci 16 (6), 1032 (2007)) and the Protein *Workshop Viewer* from protein data bank ([www.pdb.org](http://www.pdb.org)).

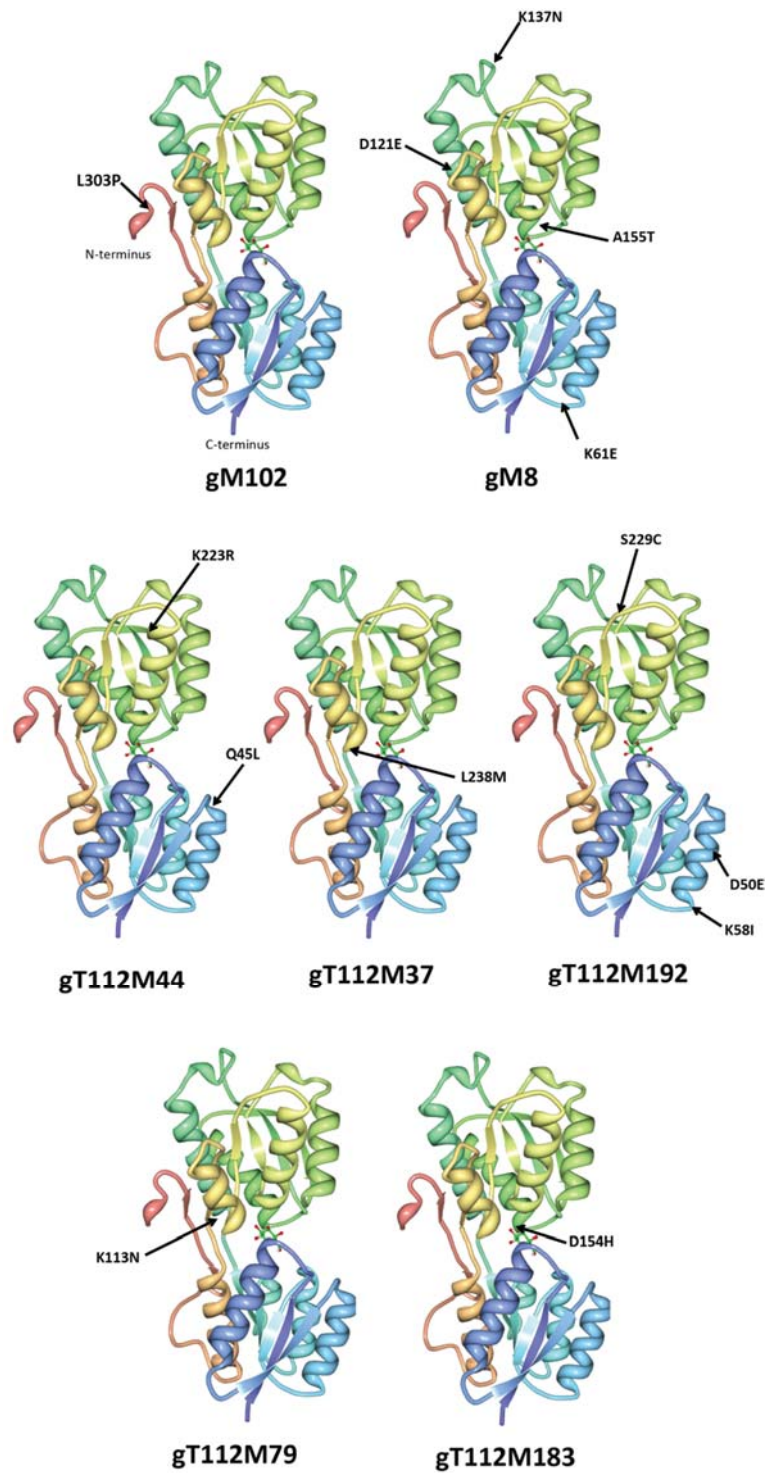

### Supplementary Figure 3

#### Characterization of candidate pyruvate FRET sensors.

(a) Sequence of three derivatives obtained by truncation of PdhR with best in vitro FRET response to pyruvate upon insertion in pFRET. (b) Normalized titration plots of full-length and the three best truncated constructs. The estimated Hill coefficients  $n$  are indicated. (c) In vitro FRET response for candidate sensors for pyruvate (closed circles) and lactate (open circles) titration. The color is unique for each sensor. (d) Representative FRET-channel image of MCF-7 cells expressing the pyruvate sensor pT162M104.

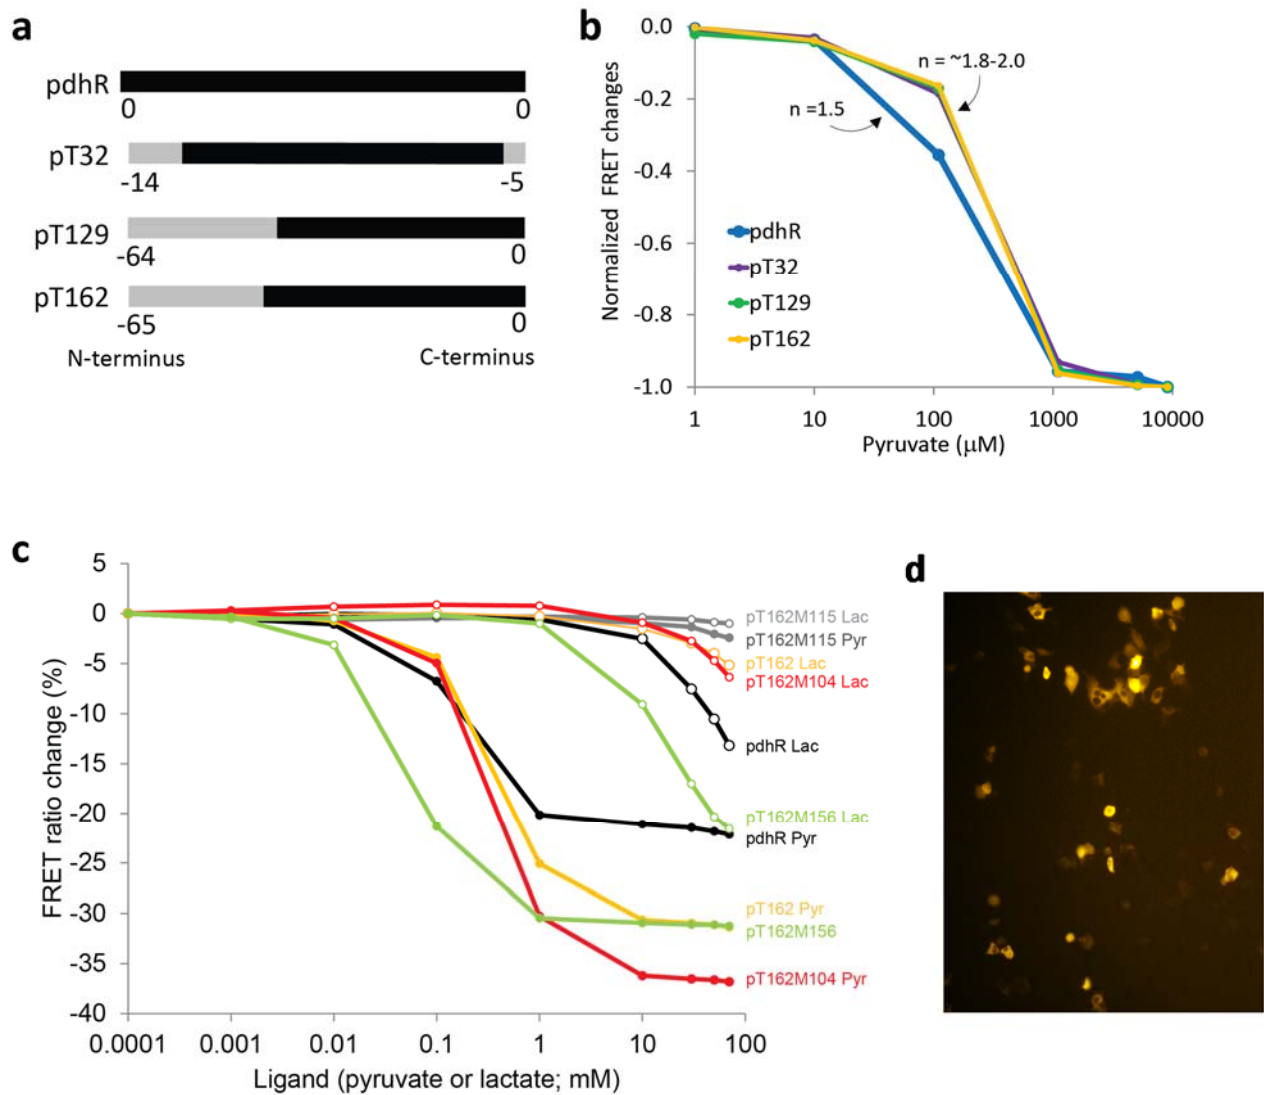

## Supplementary Figure 4

Mutations occurring the TbpA derivatives. Structure images were generated using data reported by Soriano et al. (Biochemistry-US 47 (5), 1346 (2008)) and the Protein *Workshop Viewer* from protein data bank ([www.pdb.org](http://www.pdb.org)).

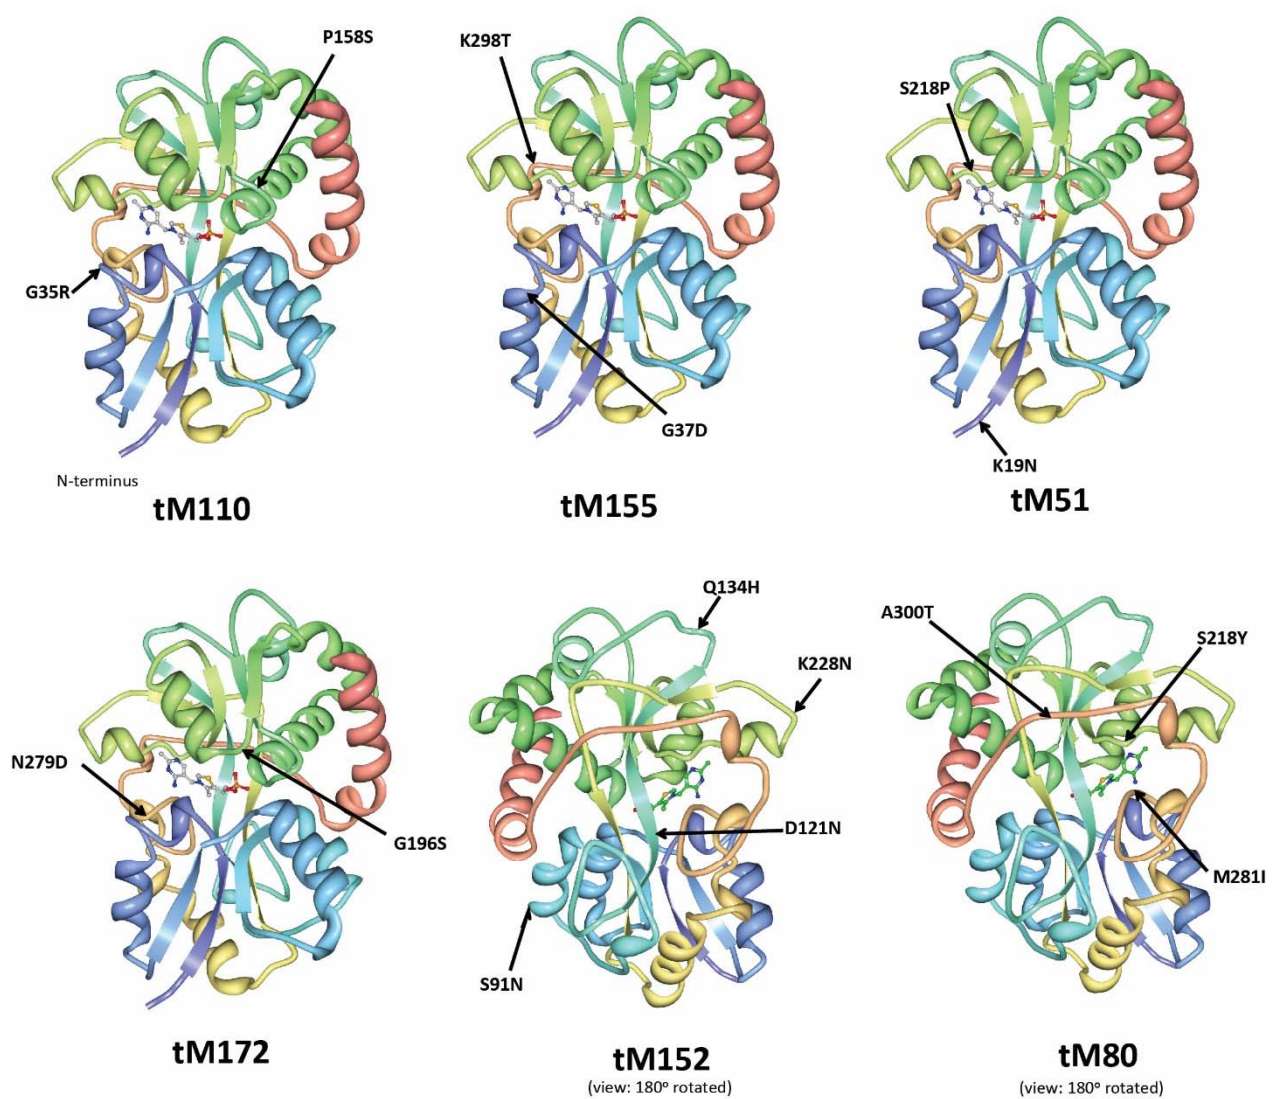

Supplement: c5an00707k1.pdf [file c5an00707k1.pdf]
